# Supplementary material for: Physiological Ecology of Microorganisms in Subglacial Lake Whillans
Source: PubMed Central journal article supplement (PMC5081474; doi:10.3389/fmicb.2016.01705), 2016-10-27
Supplement: Table2.pdf [file Table2.pdf]

Table S2. Available chemical energy for potential metabolic reactions in SLW. Reaction choice based upon the presence of aqueous reactants and products in SLW. (A) shows ranked (high to low) Gibbs energies in units of kJ per mole of electron transferred [ $A_r^{e^-}$  (kJ per mole  $e^-$ )]. (B) shows ranked (high to low) Gibbs energies of reaction as energy densities [ $A_r^{kg}$  (Log J per Kg  $H_2O$ )]. Scenario A: Observed lake conditions ( $O_2(aq)$  inclusive = 58 $\mu$ M. pE = 6.45). Scenario B. Simulated mildly anoxic.  $O_2(aq)$  set at 1 nM. pE = 2. SLW data are from cast 1. See methods section for full details.

(A)

| Scenario A. Observed SLW. $O_2$ inclusive 58 $\mu$ M.<br>pE = 6.45.                | TEA       | # e- | $A_r^{e^-}$ (kJ<br>per mole<br>e-) | $A_r^{kg}$ (J per<br>Kg $H_2O$ ) |
|------------------------------------------------------------------------------------|-----------|------|------------------------------------|----------------------------------|
| $2CHOOH + O_2 \rightarrow 2HCO_3^- + 2H^+$                                         | $O_2$     | 4    | 129.6                              | $3.86 \times 10^{-1}$            |
| $CH_3COO^- + 2O_2 \rightarrow 2HCO_3^- + H^+$                                      | $O_2$     | 8    | 109.2                              | 1.16                             |
| $CH_4 + 2O_2 \rightarrow HCO_3^- + H^+ + H_2O$                                     | $O_2$     | 8    | 99.3                               | $1.91 \times 10^{-2}$            |
| Pyrite + 3.5 $O_2$ + $H_2O \rightarrow Fe^{2+} + 2H^+ + 2SO_4^{2-}$                | $O_2$     | 14   | 96.7                               | 22.7                             |
| $CH_4 + 1.5O_2 \rightarrow CHOO^- + H_2O + H^+$                                    | $O_2$     | 6    | 96.1                               | $1.38 \times 10^{-2}$            |
| $2CH_4 + 2O_2 \rightarrow CH_3COO^- + 2H_2O + H^+$                                 | $O_2$     | 8    | 94.5                               | $9.07 \times 10^{-3}$            |
| $7NO_3^- + \text{Pyrite} + H_2O \rightarrow Fe^{2+} + 2SO_4^{2-} + 7NO_2^- + 2H^+$ | $NO_3^-$  | 14   | 73.8                               | $7.97 \times 10^{-1}$            |
| $CHOO^- + 6H^+ + \text{Magnetite} \rightarrow HCO_3^- + 3H_2O + 3Fe^{2+}$          | $Fe^{3+}$ | 2    | 70.7                               | $1.76 \times 10^{-2}$            |
| $3Fe^{2+} + 0.5O_2 + 3H_2O \rightarrow \text{Magnetite} + 6H^+$                    | $O_2$     | 2    | 70.6                               | $1.54 \times 10^{-8}$            |
| $NO_3^- + 4CHOO^- + 2H^+ + H_2O \rightarrow NH_4^+ + 4HCO_3^-$                     | $NO_3^-$  | 8    | 66.0                               | $1.97 \times 10^{-1}$            |
| $NO_2^- + 3CHOO^- + 2H^+ + H_2O \rightarrow NH_4^+ + 3HCO_3^-$                     | $NO_2^-$  | 6    | 64.4                               | $4.95 \times 10^{-2}$            |
| $4NO_3^- + CH_4 \rightarrow HCO_3^- + 4NO_2^- + H^+ + H_2O$                        | $NO_3^-$  | 8    | 63.0                               | $1.20 \times 10^{-2}$            |
| $NO_3^- + CH_3COO^- + H^+ + H_2O \rightarrow NH_4^+ + 2HCO_3^-$                    | $NO_3^-$  | 8    | 61.6                               | $6.55 \times 10^{-1}$            |
| $CH_4 + 4\text{Magnetite} + 23H^+ \rightarrow HCO_3^- + 12Fe^{2+} + 13H_2O$        | $Fe^{3+}$ | 8    | 61.3                               | $1.18 \times 10^{-2}$            |
| $4NO_2^- + 3CH_4 + 5H^+ + H_2O \rightarrow 3HCO_3^- + 4NH_4^+$                     | $NO_2^-$  | 24   | 53.9                               | $4.14 \times 10^{-2}$            |
| $NH_4^+ + 1.5O_2 \rightarrow NO_2^- + 2H^+ + H_2O$                                 | $O_2$     | 6    | 44.3                               | $9.74 \times 10^{-1}$            |
| $NH_4^+ + 2O_2 \rightarrow NO_3^- + 2H^+ + H_2O$                                   | $O_2$     | 8    | 42.4                               | 1.24                             |
| $NO_2^- + 0.5O_2 \rightarrow NO_3^-$                                               | $O_2$     | 2    | 36.7                               | $1.03 \times 10^{-2}$            |
| $CH_3COO^- + H_2O \rightarrow CH_4 + HCO_3^-$                                      | C         | 4    | 9.5                                | $5.03 \times 10^{-2}$            |
| $NH_4^+ + 3\text{Magnetite} + 16H^+ \rightarrow 9Fe^{2+} + NO_2^- + 10H_2O$        | $Fe^{3+}$ | 6    | 6.3                                | $1.27 \times 10^{-1}$            |
| $NH_4^+ + 4\text{Magnetite} + 22H^+ \rightarrow 12Fe^{2+} + NO_3^- + 13H_2O$       | $Fe^{3+}$ | 8    | 4.5                                | $1.19 \times 10^{-1}$            |
| $NO_2^- + \text{Magnetite} + 6H^+ \rightarrow 3Fe^{2+} + NO_3^- + 3H_2O$           | $Fe^{3+}$ | 2    | -1.2                               | $-3.02 \times 10^{-4}$           |
| Scenario B. Simulated anoxic. $O_2$ set at 1 nM.<br>pE = 2                         | TEA       | # e- | $A_r^{e^-}$ (kJ<br>per mole<br>e-) | $A_r^{kg}$ (J per<br>Kg $H_2O$ ) |
| $2CHOOH + O_2 \rightarrow 2HCO_3^- + 2H^+$                                         | $O_2$     | 4    | 122.4                              | $2.45 \times 10^{-4}$            |
| $CH_3COO^- + 2O_2 \rightarrow 2HCO_3^- + H^+$                                      | $O_2$     | 8    | 102.1                              | $8.16 \times 10^{-4}$            |
| $CH_4 + 2O_2 \rightarrow HCO_3^- + H^+ + H_2O$                                     | $O_2$     | 8    | 92.1                               | $3.68 \times 10^{-5}$            |
| $CH_4 + 1.5O_2 \rightarrow CHOO^- + H_2O + H^+$                                    | $O_2$     | 6    | 89.0                               | $3.56 \times 10^{-5}$            |
| Pyrite + 3.5 $O_2$ + $H_2O \rightarrow Fe^{2+} + 2H^+ + 2SO_4^{2-}$                | $O_2$     | 14   | 88.2                               | $1.23 \times 10^{-3}$            |
| $2CH_4 + 2O_2 \rightarrow CH_3COO^- + 2H_2O + H^+$                                 | $O_2$     | 8    | 87.4                               | $3.49 \times 10^{-5}$            |
| $3Fe^{2+} + 0.5O_2 + 3H_2O \rightarrow \text{Magnetite} + 6H^+$                    | $O_2$     | 2    | 83.9                               | $3.36 \times 10^{-5}$            |
| $NO_3^- + 4CHOO^- + 2H^+ + H_2O \rightarrow NH_4^+ + 4HCO_3^-$                     | $NO_3^-$  | 8    | 66.3                               | $1.97 \times 10^{-1}$            |
| $NO_2^- + 3CHOO^- + 2H^+ + H_2O \rightarrow NH_4^+ + 3HCO_3^-$                     | $NO_2^-$  | 6    | 64.4                               | $4.95 \times 10^{-2}$            |
| $4NO_3^- + CH_4 \rightarrow HCO_3^- + 4NO_2^- + H^+ + H_2O$                        | $NO_3^-$  | 8    | 62.5                               | $1.20 \times 10^{-2}$            |
| $NO_3^- + CH_3COO^- + H^+ + H_2O \rightarrow NH_4^+ + 2HCO_3^-$                    | $NO_3^-$  | 8    | 61.6                               | $6.55 \times 10^{-1}$            |
| $NH_4^+ + 3\text{Magnetite} + 16H^+ \rightarrow 9Fe^{2+} + NO_2^- + 10H_2O$        | $Fe^{3+}$ | 6    | 56.5                               | $1.13 \times 10^{-3}$            |
| $7NO_3^- + \text{Pyrite} + H_2O \rightarrow Fe^{2+} + 2SO_4^{2-} + 7NO_2^- + 2H^+$ | $NO_3^-$  | 14   | 55.5                               | $5.99 \times 10^{-1}$            |
| $4NO_2^- + 3CH_4 + 5H^+ + H_2O \rightarrow 3HCO_3^- + 4NH_4^+$                     | $NO_2^-$  | 24   | 53.9                               | $4.14 \times 10^{-2}$            |
| $CHOO^- + 6H^+ + \text{Magnetite} \rightarrow HCO_3^- + 3H_2O + 3Fe^{2+}$          | $Fe^{3+}$ | 2    | 40.1                               | $9.96 \times 10^{-3}$            |
| $NH_4^+ + 1.5O_2 \rightarrow NO_2^- + 2H^+ + H_2O$                                 | $O_2$     | 6    | 37.1                               | $6.36 \times 10^{-6}$            |
| $NH_4^+ + 2O_2 \rightarrow NO_3^- + 2H^+ + H_2O$                                   | $O_2$     | 8    | 35.2                               | $1.41 \times 10^{-5}$            |
| $CH_4 + 4\text{Magnetite} + 23H^+ \rightarrow HCO_3^- + 12Fe^{2+} + 13H_2O$        | $Fe^{3+}$ | 8    | 30.7                               | $5.90 \times 10^{-3}$            |
| $NO_2^- + 0.5O_2 \rightarrow NO_3^-$                                               | $O_2$     | 2    | 29.6                               | $6.36 \times 10^{-6}$            |
| $CH_3COO^- + H_2O \rightarrow CH_4 + HCO_3^-$                                      | C         | 4    | 9.5                                | $5.03 \times 10^{-2}$            |
| $NH_4^+ + 3\text{Magnetite} + 16H^+ \rightarrow 9Fe^{2+} + NO_2^- + 10H_2O$        | $Fe^{3+}$ | 6    | -24.3                              | $-4.87 \times 10^{-1}$           |
| $NH_4^+ + 4\text{Magnetite} + 22H^+ \rightarrow 12Fe^{2+} + NO_3^- + 13H_2O$       | $Fe^{3+}$ | 8    | -26.2                              | $-6.99 \times 10^{-1}$           |
| $NO_2^- + \text{Magnetite} + 6H^+ \rightarrow 3Fe^{2+} + NO_3^- + 3H_2O$           | $Fe^{3+}$ | 2    | -31.8                              | $-8.14 \times 10^{-3}$           |

(B)

| Scenario A. Observed SLW. O <sub>2</sub> inclusive 58uM.<br>pE = 6.45.                                                                                              | TEA                          | #<br>e- | A <sub>r</sub> <sup>e</sup> (kJ per<br>mole e-) | A <sub>r</sub> <sup>kg</sup> (J per Kg<br>H <sub>2</sub> O) |
|---------------------------------------------------------------------------------------------------------------------------------------------------------------------|------------------------------|---------|-------------------------------------------------|-------------------------------------------------------------|
| Pyrite + 3.5O <sub>2</sub> + H <sub>2</sub> O → Fe <sup>2+</sup> + 2H <sup>+</sup> + 2SO <sub>4</sub> <sup>2-</sup>                                                 | O <sub>2</sub>               | 14      | 96.7                                            | 22.7                                                        |
| NH <sub>4</sub> <sup>+</sup> + 2O <sub>2</sub> → NO <sub>3</sub> <sup>-</sup> + 2H <sup>+</sup> + H <sub>2</sub> O                                                  | O <sub>2</sub>               | 8       | 42.4                                            | 1.24                                                        |
| CH <sub>3</sub> COO <sup>-</sup> + 2O <sub>2</sub> → 2HCO <sub>3</sub> <sup>-</sup> + H <sup>+</sup>                                                                | O <sub>2</sub>               | 8       | 109.2                                           | 1.16                                                        |
| NH <sub>4</sub> <sup>+</sup> + 1.5O <sub>2</sub> → NO <sub>2</sub> <sup>-</sup> + 2H <sup>+</sup> + H <sub>2</sub> O                                                | O <sub>2</sub>               | 6       | 44.3                                            | 9.74 x 10 <sup>-1</sup>                                     |
| 7NO <sub>3</sub> <sup>-</sup> + Pyrite + H <sub>2</sub> O → Fe <sup>2+</sup> + 2SO <sub>4</sub> <sup>2-</sup> + 7NO <sub>2</sub> <sup>-</sup> + 2H <sup>+</sup>     | NO <sub>3</sub> <sup>-</sup> | 14      | 73.8                                            | 7.97 x 10 <sup>-1</sup>                                     |
| NO <sub>3</sub> <sup>-</sup> + CH <sub>3</sub> COO <sup>-</sup> + H <sup>+</sup> + H <sub>2</sub> O → NH <sub>4</sub> <sup>+</sup> + 2HCO <sub>3</sub> <sup>-</sup> | NO <sub>3</sub> <sup>-</sup> | 8       | 61.6                                            | 6.55 x 10 <sup>-1</sup>                                     |
| 2CHOOH + O <sub>2</sub> → 2HCO <sub>3</sub> <sup>-</sup> + 2H <sup>+</sup>                                                                                          | O <sub>2</sub>               | 4       | 129.6                                           | 3.86 x 10 <sup>-1</sup>                                     |
| NO <sub>3</sub> <sup>-</sup> + 4CHOO <sup>-</sup> + 2H <sup>+</sup> + H <sub>2</sub> O → NH <sub>4</sub> <sup>+</sup> + 4HCO <sub>3</sub> <sup>-</sup>              | NO <sub>3</sub> <sup>-</sup> | 8       | 66.0                                            | 1.97 x 10 <sup>-1</sup>                                     |
| NH <sub>4</sub> <sup>+</sup> + 3Magnetite + 16H <sup>+</sup> → 9Fe <sup>2+</sup> + NO <sub>2</sub> <sup>-</sup> + 10H <sub>2</sub> O                                | Fe <sup>3+</sup>             | 6       | 6.3                                             | 1.27 x 10 <sup>-1</sup>                                     |
| NH <sub>4</sub> <sup>+</sup> + 4Magnetite + 22H <sup>+</sup> → 12Fe <sup>2+</sup> + NO <sub>3</sub> <sup>-</sup> + 13H <sub>2</sub> O                               | Fe <sup>3+</sup>             | 8       | 4.5                                             | 1.19 x 10 <sup>-1</sup>                                     |
| CH <sub>3</sub> COO <sup>-</sup> + H <sub>2</sub> O → CH <sub>4</sub> + HCO <sub>3</sub> <sup>-</sup>                                                               | C                            | 4       | 9.5                                             | 5.03 x 10 <sup>-2</sup>                                     |
| NO <sub>2</sub> <sup>-</sup> + 3CHOO <sup>-</sup> + 2H <sup>+</sup> + H <sub>2</sub> O → NH <sub>4</sub> <sup>+</sup> + 3HCO <sub>3</sub> <sup>-</sup>              | NO <sub>2</sub> <sup>-</sup> | 6       | 64.4                                            | 4.95 x 10 <sup>-2</sup>                                     |
| 4NO <sub>2</sub> <sup>-</sup> + 3CH <sub>4</sub> + 5H <sup>+</sup> + H <sub>2</sub> O → 3HCO <sub>3</sub> <sup>-</sup> + 4NH <sub>4</sub> <sup>+</sup>              | NO <sub>2</sub> <sup>-</sup> | 24      | 53.9                                            | 4.14 x 10 <sup>-2</sup>                                     |
| CH <sub>4</sub> + 2O <sub>2</sub> → HCO <sub>3</sub> <sup>-</sup> + H <sup>+</sup> + H <sub>2</sub> O                                                               | O <sub>2</sub>               | 8       | 99.3                                            | 1.91 x 10 <sup>-2</sup>                                     |
| CHOO <sup>-</sup> + 6H <sup>+</sup> + Magnetite → HCO <sub>3</sub> <sup>-</sup> + 3H <sub>2</sub> O + 3Fe <sup>2+</sup>                                             | Fe <sup>3+</sup>             | 2       | 70.7                                            | 1.76 x 10 <sup>-2</sup>                                     |
| CH <sub>4</sub> + 1.5O <sub>2</sub> → CHOO <sup>-</sup> + H <sub>2</sub> O + H <sup>+</sup>                                                                         | O <sub>2</sub>               | 6       | 96.1                                            | 1.38 x 10 <sup>-2</sup>                                     |
| 4NO <sub>3</sub> <sup>-</sup> + CH <sub>4</sub> → HCO <sub>3</sub> <sup>-</sup> + 4NO <sub>2</sub> <sup>-</sup> + H <sup>+</sup> + H <sub>2</sub> O                 | NO <sub>3</sub> <sup>-</sup> | 8       | 63.0                                            | 1.20 x 10 <sup>-2</sup>                                     |
| CH <sub>4</sub> + 4Magnetite + 23H <sup>+</sup> → HCO <sub>3</sub> <sup>-</sup> + 12Fe <sup>2+</sup> + 13H <sub>2</sub> O                                           | Fe <sup>3+</sup>             | 8       | 61.3                                            | 1.18 x 10 <sup>-2</sup>                                     |
| NO <sub>2</sub> <sup>-</sup> + 0.5O <sub>2</sub> → NO <sub>3</sub> <sup>-</sup>                                                                                     | O <sub>2</sub>               | 2       | 36.7                                            | 1.03 x 10 <sup>-2</sup>                                     |
| 2CH <sub>4</sub> + 2O <sub>2</sub> → CH <sub>3</sub> COO <sup>-</sup> + 2H <sub>2</sub> O + H <sup>+</sup>                                                          | O <sub>2</sub>               | 8       | 94.5                                            | 9.07 x 10 <sup>-3</sup>                                     |
| 3Fe <sup>2+</sup> + 0.5O <sub>2</sub> + 3H <sub>2</sub> O → Magnetite + 6H <sup>+</sup>                                                                             | O <sub>2</sub>               | 2       | 70.6                                            | 1.54 x 10 <sup>-8</sup>                                     |
| NO <sub>2</sub> <sup>-</sup> + Magnetite + 6H <sup>+</sup> → 3Fe <sup>2+</sup> + NO <sub>3</sub> <sup>-</sup> + 3H <sub>2</sub> O                                   | Fe <sup>3+</sup>             | 2       | -1.2                                            | -3.02 x 10 <sup>-4</sup>                                    |
| Scenario B. Simulated anaerobic. O <sub>2</sub> set at 1 nM.<br>pE = 2                                                                                              | TEA                          | #<br>e- | A <sub>r</sub> <sup>e</sup> (kJ per<br>mole e-) | A <sub>r</sub> <sup>kg</sup> (J per Kg<br>H <sub>2</sub> O) |
| NO <sub>3</sub> <sup>-</sup> + CH <sub>3</sub> COO <sup>-</sup> + H <sup>+</sup> + H <sub>2</sub> O → NH <sub>4</sub> <sup>+</sup> + 2HCO <sub>3</sub> <sup>-</sup> | NO <sub>3</sub> <sup>-</sup> | 8       | 61.6                                            | 6.55 x 10 <sup>-1</sup>                                     |
| 7NO <sub>3</sub> <sup>-</sup> + Pyrite + H <sub>2</sub> O → Fe <sup>2+</sup> + 2SO <sub>4</sub> <sup>2-</sup> + 7NO <sub>2</sub> <sup>-</sup> + 2H <sup>+</sup>     | NO <sub>3</sub> <sup>-</sup> | 14      | 55.5                                            | 5.99 x 10 <sup>-1</sup>                                     |
| NO <sub>3</sub> <sup>-</sup> + 4CHOO <sup>-</sup> + 2H <sup>+</sup> + H <sub>2</sub> O → NH <sub>4</sub> <sup>+</sup> + 4HCO <sub>3</sub> <sup>-</sup>              | NO <sub>3</sub> <sup>-</sup> | 8       | 66.3                                            | 1.97 x 10 <sup>-1</sup>                                     |
| CH <sub>3</sub> COO <sup>-</sup> + H <sub>2</sub> O → CH <sub>4</sub> + HCO <sub>3</sub> <sup>-</sup>                                                               | C                            | 4       | 9.5                                             | 5.03 x 10 <sup>-2</sup>                                     |
| NO <sub>2</sub> <sup>-</sup> + 3CHOO <sup>-</sup> + 2H <sup>+</sup> + H <sub>2</sub> O → NH <sub>4</sub> <sup>+</sup> + 3HCO <sub>3</sub> <sup>-</sup>              | NO <sub>2</sub> <sup>-</sup> | 6       | 64.4                                            | 4.95 x 10 <sup>-2</sup>                                     |
| 4NO <sub>2</sub> <sup>-</sup> + 3CH <sub>4</sub> + 5H <sup>+</sup> + H <sub>2</sub> O → 3HCO <sub>3</sub> <sup>-</sup> + 4NH <sub>4</sub> <sup>+</sup>              | NO <sub>2</sub> <sup>-</sup> | 24      | 53.9                                            | 4.14 x 10 <sup>-2</sup>                                     |
| 4NO <sub>3</sub> <sup>-</sup> + CH <sub>4</sub> → HCO <sub>3</sub> <sup>-</sup> + 4NO <sub>2</sub> <sup>-</sup> + H <sup>+</sup> + H <sub>2</sub> O                 | NO <sub>3</sub> <sup>-</sup> | 8       | 62.5                                            | 1.20 x 10 <sup>-2</sup>                                     |
| CHOO <sup>-</sup> + 6H <sup>+</sup> + Magnetite → HCO <sub>3</sub> <sup>-</sup> + 3H <sub>2</sub> O + 3Fe <sup>2+</sup>                                             | Fe <sup>3+</sup>             | 2       | 40.1                                            | 9.96 x 10 <sup>-3</sup>                                     |
| CH <sub>4</sub> + 4Magnetite + 23H <sup>+</sup> → HCO <sub>3</sub> <sup>-</sup> + 12Fe <sup>2+</sup> + 13H <sub>2</sub> O                                           | Fe <sup>3+</sup>             | 8       | 30.7                                            | 5.90 x 10 <sup>-3</sup>                                     |
| Pyrite + 3.5O <sub>2</sub> + H <sub>2</sub> O → Fe <sup>2+</sup> + 2H <sup>+</sup> + 2SO <sub>4</sub> <sup>2-</sup>                                                 | O <sub>2</sub>               | 14      | 88.2                                            | 1.23 x 10 <sup>-3</sup>                                     |
| NH <sub>4</sub> <sup>+</sup> + 3Magnetite + 16H <sup>+</sup> → 9Fe <sup>2+</sup> + NO <sub>2</sub> <sup>-</sup> + 10H <sub>2</sub> O                                | Fe <sup>3+</sup>             | 6       | 56.5                                            | 1.13 x 10 <sup>-3</sup>                                     |
| CH <sub>3</sub> COO <sup>-</sup> + 2O <sub>2</sub> → 2HCO <sub>3</sub> <sup>-</sup> + H <sup>+</sup>                                                                | O <sub>2</sub>               | 8       | 102.1                                           | 8.16 x 10 <sup>-4</sup>                                     |
| 2CHOOH + O <sub>2</sub> → 2HCO <sub>3</sub> <sup>-</sup> + 2H <sup>+</sup>                                                                                          | O <sub>2</sub>               | 4       | 122.4                                           | 2.45 x 10 <sup>-4</sup>                                     |
| CH <sub>4</sub> + 2O <sub>2</sub> → HCO <sub>3</sub> <sup>-</sup> + H <sup>+</sup> + H <sub>2</sub> O                                                               | O <sub>2</sub>               | 8       | 92.1                                            | 3.68 x 10 <sup>-5</sup>                                     |
| CH <sub>4</sub> + 1.5O <sub>2</sub> → CHOO <sup>-</sup> + H <sub>2</sub> O + H <sup>+</sup>                                                                         | O <sub>2</sub>               | 6       | 89.0                                            | 3.56 x 10 <sup>-5</sup>                                     |
| 2CH <sub>4</sub> + 2O <sub>2</sub> → CH <sub>3</sub> COO <sup>-</sup> + 2H <sub>2</sub> O + H <sup>+</sup>                                                          | O <sub>2</sub>               | 8       | 87.4                                            | 3.49 x 10 <sup>-5</sup>                                     |
| 3Fe <sup>2+</sup> + 0.5O <sub>2</sub> + 3H <sub>2</sub> O → Magnetite + 6H <sup>+</sup>                                                                             | O <sub>2</sub>               | 2       | 83.9                                            | 3.36 x 10 <sup>-5</sup>                                     |
| NO <sub>2</sub> <sup>-</sup> + 0.5O <sub>2</sub> → NO <sub>3</sub> <sup>-</sup>                                                                                     | O <sub>2</sub>               | 2       | 29.6                                            | 6.36 x 10 <sup>-6</sup>                                     |
| NH <sub>4</sub> <sup>+</sup> + 2O <sub>2</sub> → NO <sub>3</sub> <sup>-</sup> + 2H <sup>+</sup> + H <sub>2</sub> O                                                  | O <sub>2</sub>               | 8       | 35.2                                            | 1.41 x 10 <sup>-6</sup>                                     |
| NH <sub>4</sub> <sup>+</sup> + 1.5O <sub>2</sub> → NO <sub>2</sub> <sup>-</sup> + 2H <sup>+</sup> + H <sub>2</sub> O                                                | O <sub>2</sub>               | 6       | 37.1                                            | 6.36 x 10 <sup>-6</sup>                                     |
| NH <sub>4</sub> <sup>+</sup> + 3Magnetite + 16H <sup>+</sup> → 9Fe <sup>2+</sup> + NO <sub>2</sub> <sup>-</sup> + 10H <sub>2</sub> O                                | Fe <sup>3+</sup>             | 6       | -24.3                                           | -4.87 x 10 <sup>-1</sup>                                    |
| NH <sub>4</sub> <sup>+</sup> + 4Magnetite + 22H <sup>+</sup> → 12Fe <sup>2+</sup> + NO <sub>3</sub> <sup>-</sup> + 13H <sub>2</sub> O                               | Fe <sup>3+</sup>             | 8       | -26.2                                           | -6.99 x 10 <sup>-1</sup>                                    |
| NO <sub>2</sub> <sup>-</sup> + Magnetite + 6H <sup>+</sup> → 3Fe <sup>2+</sup> + NO <sub>3</sub> <sup>-</sup> + 3H <sub>2</sub> O                                   | Fe <sup>3+</sup>             | 2       | -31.8                                           | -8.14 x 10 <sup>-3</sup>                                    |
